# Supplementary material for: Migration and transformation of dissolved carbon during accumulated cyanobacteria decomposition in shallow eutrophic lakes: a simulated microcosm study
Source: PeerJ. 2018 Nov 7;6:e5922. doi: 10.7717/peerj.5922 (PMC6228553; doi:10.7717/peerj.5922)
Supplement: Supplemental Information 1 [file peerj-06-5922-s001.xlsx]

## Sheet: Fig4a
Time (Day)	M	S	SM	SH
	Dissolved Oxygen (DO)
1	6.35	1.45	3.12	3.55
2	0.24	0.66	0.11	0.32
3	0.17	1.02	0.1	0.08
4	0.21	0.47	0.08	0.08
5	0.17	1.14	0.12	0.11
6	0.2	0.51	0.16	0.16
7	0.14	1.02	0.14	0.1
8	0.51	0.69	0.17	0.09
9	0.17	1.02	0.15	0.17
10	0.11	0.89	0.14	0.17
11	0.1	0.41	0.12	0.14
12	0.13	0.39	0.18	0.18
13	0.06	0.83	0.09	0.12
14	0.09	0.7	0.11	0.14
15	0.14	0.83	0.17	0.18
16	0.2	1.1	0.22	0.18
18	0.24	0.87	0.22	0.15
20	0.22	0.67	0.13	0.09
22	0.2	0.97	0.07	0.07
24	0.15	0.61	0.11	0.12
26	0.14	1.24	0.08	0.09
28	0.11	0.9	0.07	0.05
30	0.12	0.53	0.1	0.1
33	0.16	1.02	0.11	0.09
36	0.09	0.7	0.07	0.06
43	0.1	1.03	0.08	0.07
53	0.12	1.16	0.57	0.12
63	0.14	1.01	0.59	0.09
73	0.07	1.56	0.44	0.44

## Sheet: Fig4b
Time (Day)	M	S	SM	SH
	Oxidation Reduction Potential or Eh
1	34.8	41.4	39.6	37.1
2	-201	-76.5	-177.1	-218.8
3	-180.4	-34.8	-225.4	-207.4
4	-180.1	-14.1	-198.7	-195.2
5	-251.9	53.8	-256.6	-244
6	-210.5	51	-276.4	-283
7	-241.5	83.3	-297.2	-276.9
8	-210.7	-61.5	-214.1	-238.7
9	-298.5	96.9	-270.7	-262.7
10	-273.3	-21.2	-263.8	-284
11	-218.6	39.1	-227.3	-230.1
12	-225	1.2	-289	-225.1
13	-240.1	83.5	-216.1	-211.6
14	-288.9	-61.3	-250	-234.3
15	-222.5	13.6	-219.6	-204.3
16	-212.6	41.9	-260.3	-223.4
18	-205.8	41.2	-256.6	-229.5
20	-234.5	59.8	-283.4	-249
22	-262.5	13.8	-310.9	-276.5
24	-231	25.1	-278.5	-279.4
26	-243.5	-5.3	-285.1	-259.5
28	-297	7.8	-320.9	-335.6
30	-262.1	-16.6	-278.3	-299.4
33	-286.2	-14.6	-288.6	-300.4
36	-284.5	8.5	-295.2	-307.5
43	-291.5	63.5	-259.8	-300.1
53	-257.6	58.8	-130.3	-293.5
63	-290.6	54.1	-153.2	-309.2
73	-308.3	57.9	-206.2	-206.2

## Sheet: Fig4c
Time (Day)	M	S	SM	SH
	pH
1	8.046	7.85	7.735	7.778
2	6.89	7.583	7.245	6.25
3	7.068	7.308	7.039	6.8
4	7.05	7.225	7.105	6.816
5	6.7	7.6	6.55	6.83
6	7	7.5	7	7
7	6.9	7.63	6.9	7.2
8	7.51	7.4	6.5	7.05
9	6.91	7.69	6.64	6.68
10	7.61	7.54	7.46	6.91
11	6.59	7.63	6.48	6.22
12	6.623	7.82	7.1	6.286
13	7.45	7.72	7.036	6.262
14	7.027	7.648	7.315	6.436
15	7.143	7.619	6.557	6.3
16	7.769	7.835	6.854	6.453
18	6.794	7.603	6.807	6.411
20	7.082	7.581	7.174	6.426
22	7.224	7.597	7.412	6.495
24	7.805	7.87	7.949	6.877
26	7.947	7.693	7.985	6.824
28	8.082	7.724	7.861	6.968
30	8.106	7.723	7.958	7.124
33	8.532	8.04	8.348	7.585
36	8.657	7.871	8.483	7.695
43	8.678	8.087	8.677	8.491
53	8.55	7.93	8.59	8.58
63	8.309	7.62	8.303	8.405
73	8.201	7.474	8.17	8.17
