# Supplementary material for: Migration and transformation of dissolved carbon during accumulated cyanobacteria decomposition in shallow eutrophic lakes: a simulated microcosm study
Source: PeerJ. 2018 Nov 7;6:e5922. doi: 10.7717/peerj.5922 (PMC6228553; doi:10.7717/peerj.5922)
Supplement: Supplemental Information 2 [file peerj-06-5922-s002.xlsx]

## Sheet: Fig5a
Time (day)	TDC concentration (mg/L)
	S	SM	SH
1	44.65	29.85	35.35
2	50.15	59.6	62.6
3	68.55	116.4	180.75
4	104.65	191.4	270.15
5	54.05	184.95	389.65
6	42.05	225	324.7
7	44.95	350.15	423
8	49.9	475.2	499.6
9	57.3	450.1	765
10	101.97	534.5	920
11	100.55	643	1261.5
12	56.9	716	1655
13	56.9	745.5	1533
14	70.1	829.9	1826
15	81.5	909.9	1752
16	229.8	681.7	1708
18	190.5	738.6	1900
20	171.2	815.1	1560
22	175	350.8	1369.9
24	222.9	573.2	1364
26	180.3	603.1	1589
28	198.6	599.4	1568
30	141.2	503.9	1333
33	144.2	491.2	1440
36	88.6	487.2	1278
43	160.5	295.8	1029
53	115.8	316.8	431
63	77.3	245.9	412.8
73	83.9	228.1	364

## Sheet: Fig5b
Time (day)	TDC concentration (mg/L)
	M	SM
1	42.95	29.85
2	53.55	59.6
3	110.15	116.4
4	119.9	191.4
5	249.05	184.95
6	263.85	225
7	299.35	350.15
8	460.45	475.2
9	452.1	450.1
10	525.815	534.5
11	625	643
12	642.5	716
13	665.5	745.5
14	627.3	829.9
15	723.8	909.9
16	762.5	681.7
18	712.9	738.6
20	754.3	815.1
22	670.4	350.8
24	723.2	573.2
26	696.9	603.1
28	796.4	599.4
30	488.8	503.9
33	557.1	491.2
36	551.7	487.2
43	356.1	295.8
53	367	316.8
63	236.4	245.9
73	274.9	228.1

## Sheet: Fig5c
Time (day)	DOC concentration (mg/L)
	S	SM	SH
1	12.1	15.7	14.95
2	12.45	26.45	27.3
3	15.15	57.9	123.075
4	69.2	147.45	219.3
5	18.55	151.15	369.4
6	4.5	193.2	303.5
7	6.35	323.15	405.9
8	11.6	443.55	482.35
9	19.15	422.55	677.5
10	64.5295	503.7	894.4
11	60.55	607.1	1232.55
12	15.75	678.35	1624.1
13	13.55	693.75	1494.9
14	33.4	760.1	1792.3
15	48.4	835.1	1698.2
16	133.9	525.2	1523.4
18	153.9	664.4	1823.7
20	127.8	715.4	1487.3
22	62.1	231.2	1044.2
24	52	424.9	1196.2
26	123.7	414	1424
28	142.7	421.6	1412.3
30	74.9	322.1	1189.1
33	88.9	285.6	1232.9
36	41	262.6	1063.8
43	91.6	92.2	727.1
53	63.8	88.6	230.8
63	25.9	55.8	119.2
73	36.2	61.8	102.4

## Sheet: Fig5d
Time (day)	DOC concentration (mg/L)
	M	SM
1	14.3	15.7
2	18.2	26.45
3	71.3	57.9
4	89.9	147.45
5	216.8	151.15
6	235.2	193.2
7	271.5	323.15
8	427.35	443.55
9	418.6	422.55
10	496.82	503.7
11	584.1	607.1
12	609.4	678.35
13	630.3	693.75
14	581	760.1
15	673.9	835.1
16	653.6	525.2
18	661.2	664.4
20	683.7	715.4
22	578.3	231.2
24	618.9	424.9
26	529.9	414
28	664.9	421.6
30	268.8	322.1
33	409	285.6
36	400.2	262.6
43	217.4	92.2
53	239.4	88.6
63	105.8	55.8
73	149.1	61.8

## Sheet: Fig5e
Time (day)	DIC concentration (mg/L)
	S	SM	SH
1	32.55	14.15	20.4
2	37.7	33.15	35.3
3	53.4	58.5	57.675
4	35.45	43.95	50.85
5	35.5	33.8	20.25
6	37.55	31.8	21.2
7	38.6	27	17.1
8	38.3	31.65	17.25
9	38.15	27.55	87.5
10	37.44	30.8	25.6
11	40	35.9	28.95
12	41.15	37.65	30.9
13	43.35	51.75	38.1
14	36.7	69.8	33.7
15	33.1	74.8	53.8
16	95.9	156.5	184.6
18	36.6	74.2	76.3
20	43.4	99.7	72.7
22	112.9	119.6	325.7
24	170.9	148.3	167.8
26	56.6	189.1	165
28	55.9	177.8	155.7
30	66.3	181.8	143.9
33	55.3	205.6	207.1
36	47.6	224.6	214.2
43	68.9	203.6	301.9
53	52	228.2	200.2
63	51.4	190.1	293.6
73	47.7	166.3	261.6

## Sheet: Fig5f
Time (day)	DIC concentration (mg/L)
	M	SM
1	28.7	14.15
2	35.35	33.15
3	38.85	58.5
4	30	43.95
5	32.25	33.8
6	28.65	31.8
7	27.85	27
8	33.1	31.65
9	33.5	27.55
10	28.99	30.8
11	40.9	35.9
12	33.1	37.65
13	35.2	51.75
14	46.3	69.8
15	49.9	74.8
16	108.9	156.5
18	51.7	74.2
20	70.6	99.7
22	92.1	119.6
24	104.3	148.3
26	167	189.1
28	131.5	177.8
30	220	181.8
33	148.1	205.6
36	151.5	224.6
43	138.7	203.6
53	127.6	228.2
63	130.6	190.1
73	125.8	166.3

## Sheet: Fig5g
Time (day)	DOC/TDC (%)
	S	SM	SH
1	27.1	52.596	42.291
2	24.826	44.379	43.61
3	22.101	49.742	68.091
4	66.125	77.038	81.177
5	34.32	81.725	94.803
6	10.702	85.867	93.471
7	14.127	92.289	95.957
8	23.246	93.34	96.547
9	33.421	93.879	88.562
10	63.283	94.238	97.217
11	60.219	94.417	97.705
12	27.68	94.742	98.133
13	23.814	93.058	97.515
14	47.646	91.589	98.154
15	59.387	91.779	96.929
16	58.268	77.043	89.192
18	80.787	89.954	95.984
20	74.65	87.768	95.34
22	35.486	65.906	76.225
24	23.329	74.128	87.698
26	68.608	68.645	89.616
28	71.853	70.337	90.07
30	53.045	63.921	89.205
33	61.65	58.143	85.618
36	46.275	53.9	83.239
43	57.072	31.17	70.661
53	55.095	27.967	53.55
63	33.506	22.692	28.876
73	43.147	27.093	28.132

## Sheet: Fig5h
Time (day)	DOC/TDC (%)
	M	SM
1	33.1781	52.596
2	33.9869	44.379
3	64.7299	49.742
4	74.9792	77.038
5	87.0508	81.725
6	89.1416	85.867
7	90.6965	92.289
8	92.8114	93.34
9	92.5901	93.879
10	94.4858	94.238
11	93.456	94.417
12	94.8482	94.742
13	94.7107	93.058
14	92.6192	91.589
15	93.1058	91.779
16	85.718	77.043
18	92.7479	89.954
20	90.6403	87.768
22	86.2619	65.906
24	85.578	74.128
26	76.0367	68.645
28	83.4882	70.337
30	54.9918	63.921
33	73.4159	58.143
36	72.5394	53.9
43	61.0503	31.17
53	65.2316	27.967
63	44.7546	22.692
73	54.2379	27.093
