# Supplementary material for: Migration and transformation of dissolved carbon during accumulated cyanobacteria decomposition in shallow eutrophic lakes: a simulated microcosm study
Source: PeerJ. 2018 Nov 7;6:e5922. doi: 10.7717/peerj.5922 (PMC6228553; doi:10.7717/peerj.5922)
Supplement: Supplemental Information 5 [file peerj-06-5922-s005.xlsx]

## Sheet: Sheet1
	Crucible weight (g)	Crucible+sediment weight before dry (g)	Crucible+sediment weight after dry (g)	Dry weight of sediment (g)	Water content (g)	Porosity
Sample A	10.704	14.9827	12.6697	1.9657	2.313	0.746302
Sample B	12.2216	15.7726	14.3583	2.1367	1.4143	0.62332
Sample C	11.0145	14.38	12.8304	1.8159	1.5496	0.680856
						0.683493
